# Supplementary material
Source: PubMed Central journal article supplement (PMC1326164)

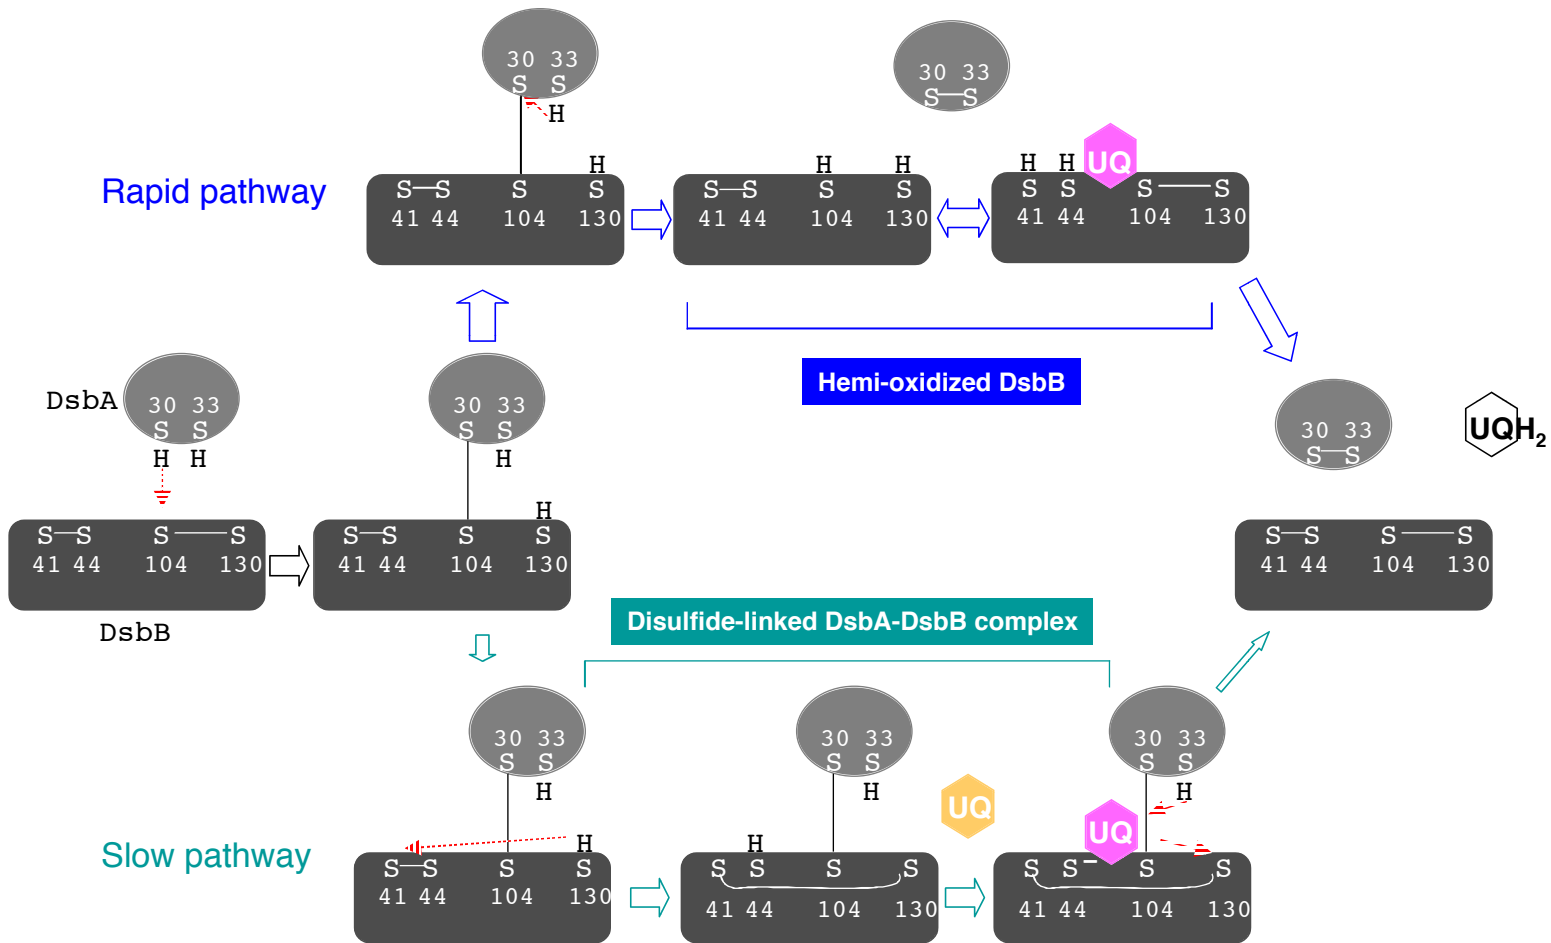

Supplement: pnas_0507570103_1.pdf [file pnas_0507570103_1.pdf]

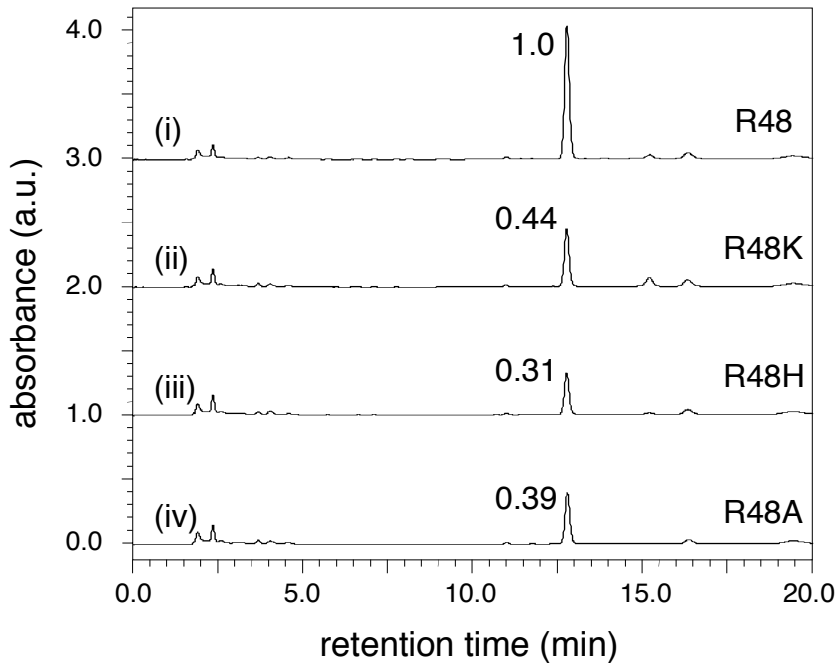

Supplement: pnas_0507570103_2.pdf [file pnas_0507570103_2.pdf]

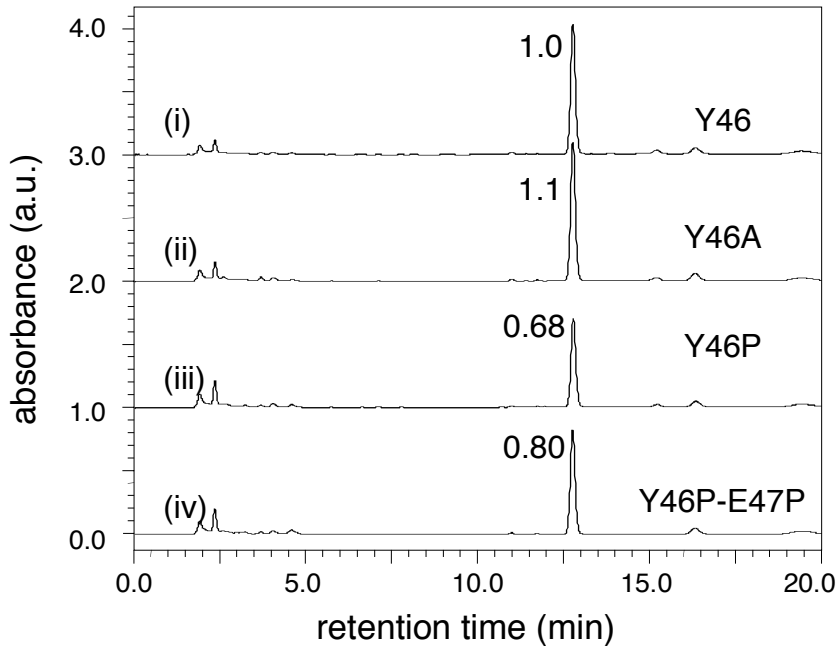

Supplement: pnas_0507570103_3.pdf [file pnas_0507570103_3.pdf]
